# Supplementary material
Source: MDPI journal article supplement (https://www.mdpi.com/2311-553X/4/2/10)
Supplement: s1 [file s1]

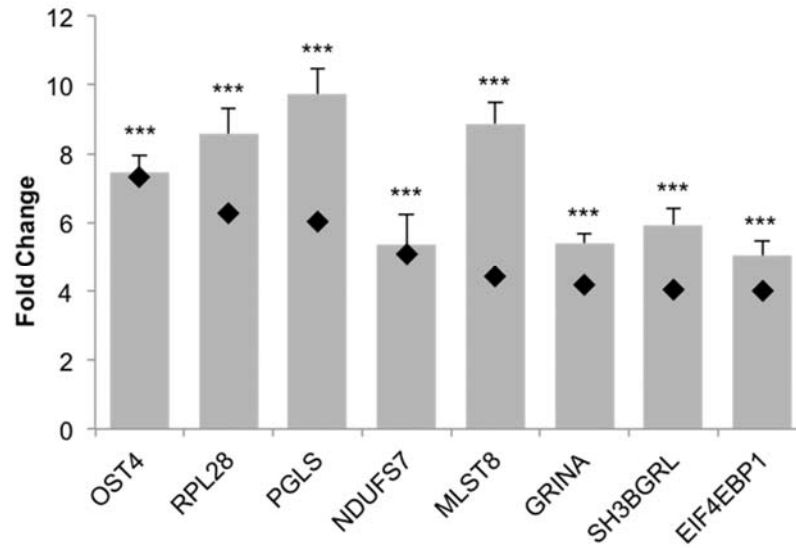

**Figure S1.** Quantitative real-time PCR validation of genes identified by RNAseq. Pull-down samples were normalized to untransfected control lysate samples and fold change calculated as enrichment of genes in hsa-miR-210 pull-down samples compared to cel-miR-239b samples. Errors represent standard deviation, \*\*\*  $p < 0.001$ ,  $n = 3$ , Welch two sample t-test, ● indicates corresponding fold change from RNAseq data.

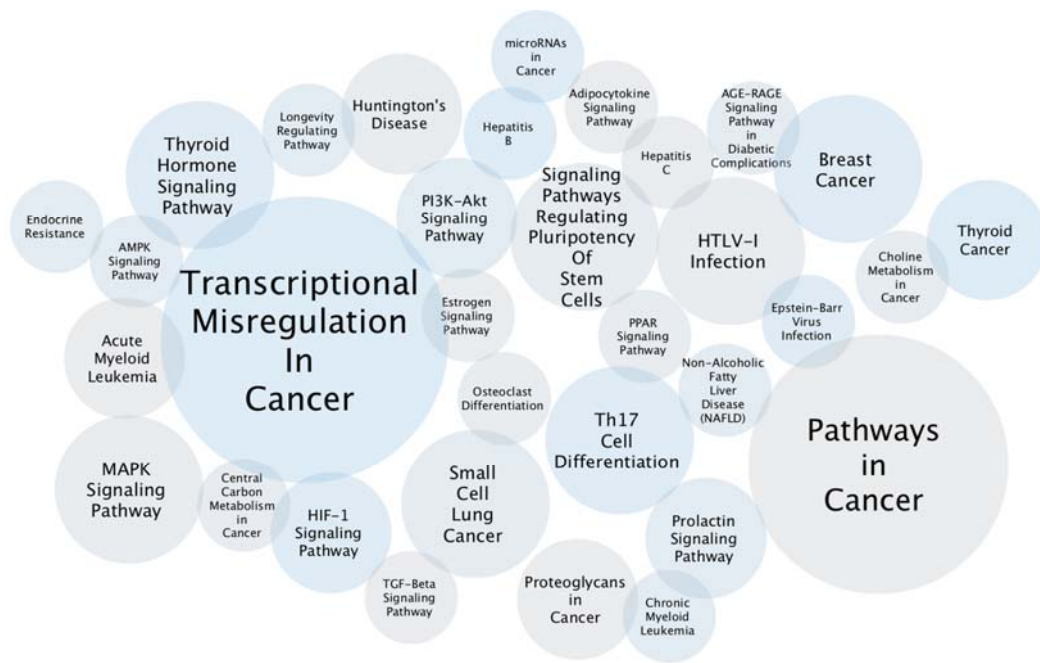

**Figure S2.** Enriched transcription factor binding site KEGG pathway terms. Graphical representation of KEGG pathway terms annotated to multiple transcription factors with enriched binding sites among miR-210 target genes. Node size correlates to number of associated transcription factors.

**Table S6.** Target genes contributing to enriched functional KEGG pathways. Potential key target genes were selected based on multiple annotations among KEGG pathways. Metabolic genes overlapping across oxidative phosphorylation and neurodegenerative pathways are highlighted in dark blue, cancer-associated genes overlapping with mTOR and VEGFB signalling pathways are highlighted in dark green. Vacuolar ATPase genes highlighted in dark red are associated with synaptic vesicle recycling.

| Huntington's disease | Oxidative phos. | Alzheimer's disease | VEGF signalling pathway | mTOR signalling pathway | Renal cell carcinoma | Parkinson's disease | Acute myeloid leukaemia | Bladder cancer |
|----------------------|-----------------|---------------------|-------------------------|-------------------------|----------------------|---------------------|-------------------------|----------------|
| AP2S1                | ATP5D           | APOE                | BAD                     | EIF4EBP1                | HRAS                 | ATP5D               | BAD                     | HRAS           |
| ATP5D                | ATP5G2          | ATP5D               | HRAS                    | MAPK3                   | MAP2K2               | ATP5G2              | EIF4EBP1                | MAP2K2         |
| ATP5G2               | ATP6V0C         | ATP5G2              | HSPB1                   | MLST8                   | MAPK3                | COX6A1              | HRAS                    | MAPK3          |
| CLTB                 | ATP6V0E2        | BAD                 | MAP2K2                  | PGF                     | PGF                  | COX8A               | MAP2K2                  | PGF            |
| COX6A1               | ATP6V1F         | COX6A1              | MAPK3                   | RPS6KB2                 | TCEB2                | CYC1                | MAPK3                   | VEGFB          |
| COX8A                | COX6A1          | COX8A               | MAPKAPK3                | VEGFB                   | TGFB1                | NDUFA4L2            | RPS6KB2                 |                |
| CYC1                 | COX8A           | CYC1                | RAC3                    |                         | VEGFB                | NDUFS7              |                         |                |
| GPX1                 | CYC1            | GAPDH               | SPHK2                   |                         |                      | NDUFS8              |                         |                |
| NDUFA4L2             | NDUFA4L2        | MAPK3               |                         |                         |                      | UBE2L6              |                         |                |
| NDUFS7               | NDUFS7          | NDUFA4L2            |                         |                         |                      | UQCRC1              |                         |                |
| NDUFS8               | NDUFS8          | NDUFS7              |                         |                         |                      |                     |                         |                |
| POLR2E               | UQCRC1          | NDUFS8              |                         |                         |                      |                     |                         |                |
| POLR2I               |                 | UQCRC1              |                         |                         |                      |                     |                         |                |
| POLR2J               |                 |                     |                         |                         |                      |                     |                         |                |
| POLR2L               |                 |                     |                         |                         |                      |                     |                         |                |
| UQCRC1               |                 |                     |                         |                         |                      |                     |                         |                |

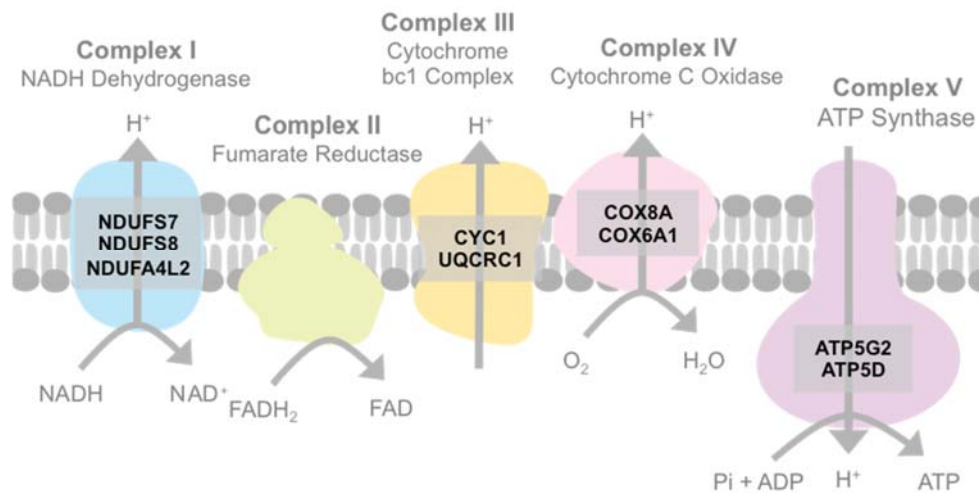

**Figure S3.** Targets in oxidative phosphorylation pathway. A number of identified miR-210 pull-down targets are subunits of large protein complexes that make up the OXPHOS electron transport chain. Multiple subunits of complexes I, III, IV, and V were significantly enriched by miR-210, all are nuclear encoded OXPHOS genes.

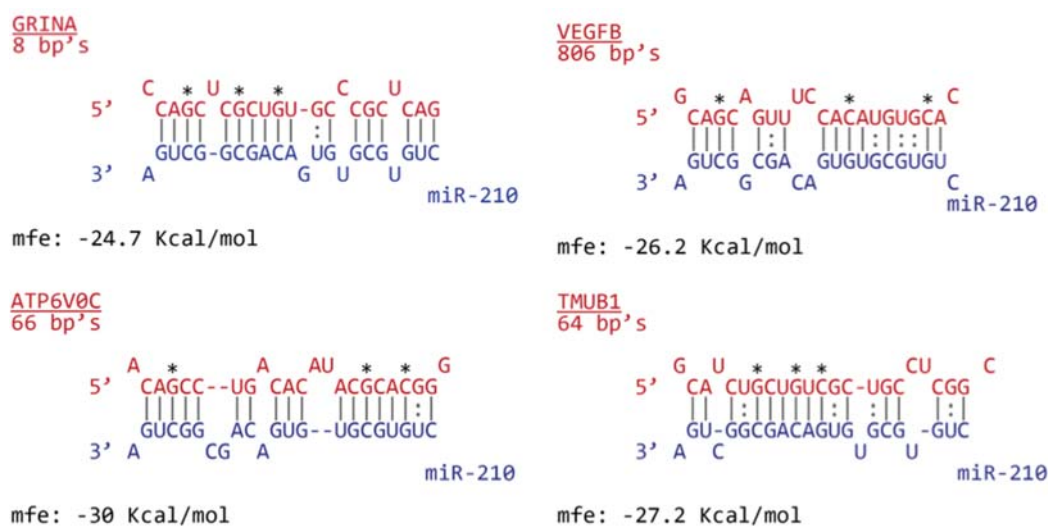

**Figure S4.** Predicted miR-210 miRNA recognition elements (MREs) in selected targets. MRE predictions generated using the RNAhybrid algorithm. Specified **bp's** indicates position downstream from stop codon, '|' indicates complimentary base-pairing, ':' indicates G:U wobble base-pairing, **mfe** = minimum free energy, '\*' indicates position of introduced point mutations; G/C>A.

**Table S7.** Gene-specific human primers used in q-PCR.

| <b>Gene</b>     | <b>Sequence 5'&gt;3'</b>                              |
|-----------------|-------------------------------------------------------|
| <i>OST4</i>     | F: TCGCCATCTTCGCCAACAT<br>R: GACGGCCACGTAGTGATAGAG    |
| <i>RPL28</i>    | F: CTTCCGCTACAACGGACTGAT<br>R: ATGACCACCACGACACCTTTG  |
| <i>PGLS</i>     | F: CATCCCGGTTTTCGACCTG<br>R: TCGGGGAGTCACTGATGGG      |
| <i>NDUFS7</i>   | F: CTTGCAAGGTCTACGACCAG<br>R: GGAATAGTGGTAGTAGCCTCCTC |
| <i>MLST8</i>    | F: GGGACTTGAAAACAGACCACA<br>R: CCGTCAGATTCCAGACATAGCA |
| <i>GRINA</i>    | F: ATGATCGCCAGCTTCTACAAC<br>R: GTGAAGTCGTAGCGGGTCTG   |
| <i>SH3BGRL3</i> | F: CTCCCGCGAAATCAAGTCCC<br>R: CCCGTTGACAATCTGGGGTG    |
| <i>EIF4EBP1</i> | F: CTATGACCGGAAATTCCTGATGG<br>R: CCCGCTTATCTTCTGGGCTA |

**Table S8.** Primer sequences for cloning 3'UTRs. Red text indicates restriction enzyme sites, gray text indicates restriction site flanking regions, and sequences in black are gene specific regions.

| <b>Target</b>            | <b>Primer: Sequence 5' &gt; 3'</b>                                                               |
|--------------------------|--------------------------------------------------------------------------------------------------|
| <i>Sequencing</i>        |                                                                                                  |
| ΨCheck2                  | F: GGACGCTCCAGATGAAATG<br>R: CAAACCCTAACCACCGCTTA                                                |
| <i>PCR Amplification</i> |                                                                                                  |
| AP2S1                    | F: CAGTCAAGCTCGAGCAGGCTGATGCTACAGTCCCTG<br>3'UTR R: TCAACTGCGGCCGCGTCTGCAGGACCACAGGTTTATTG       |
| TMUB1                    | F: CAGTATTGCTCGAGCAGATGTACCGCCCGTAGTGC<br>3'UTR R: ATCATTTAGCGGCCGCGATCACTTCACAGTTACTTTAATCTGCAC |
| GRINA                    | F: CAGTATCACTCGAGCAGAGGAGTAGCCGAGCTCCAG<br>3'UTR R: ATAGTTTAGCGGCCGCGTCTGCAGAGAGCAAATCCCATTTATTG |
| ATP6V0C                  | F: CAGTGACTCTCGAGCAGAAGTAGACCCCTCTCCGAGC<br>3'UTR R: TCACTGCGGCCGCGTAGCCCGTCACATCCAAGAAC         |
| ACTB                     | F: CAGTATCACTCGAGCAGGGCGGACTATGACTTAGTTG<br>3'UTR R: ATCATTTAGCGGCCGCGTCTGGTGTGCACTTTTATTCAACTG  |
| MLST8                    | F: GAATGACTCTCGAGCAGCTGCCTGGCCTTCAATGAC<br>3'UTR R: TCAACTGCGGCCGCGTCCGAGCAACATCTGCGTG           |
| VEGFB                    | F: CAGTCATACTCGAGCAGGAGCTCAACCCAGACACC<br>3'UTR R: ATCATTAGCGGCCGCGTCCAGAGAAGTTTGAGACTATCTTTAC   |
| EIF4EBP1                 | F: CAGTGACTCTCGAGCAGAGCACCAGCCATCGTGTG<br>3'UTR R: TCACTGCGGCCGCGTCTTGCCCTAGGGCGAAG              |
| MAP2K2                   | F: CAGTGACTCTCGAGCAGGTGACAGTGGCCGGGCTC<br>3'UTR R: TCACTGCGGCCGCGTAGCCTCTGAGACCACACAGCA          |
| ATP5G2                   | F: CAGTGACTCTCGAGCAGATGTGAAGGAGCCGTCTC<br>3'UTR R: TCACTGCGGCCGCGTATCTCTGTCAAACCCGTGAGC          |
| ATP5D                    | F: CAGTGACTCTCGAGCAGGAGTAGGCGGTGCGTACC<br>3'UTR R: TCACTGCGGCCGCGTACAGGCTTCCGGGTCTTTAATGG        |
| COX8A                    | F: CAGTGACTCTCGAGCAGACAGGAGGCCAGAGTGAAG<br>3'UTR R: TCACTGCGGCCGCGTACCACCAAGCAGGGTCAGT           |
| COX6A1                   | F: GAATGATCTCGAGCAGAGAGAATCTGGACCACTACC<br>3'UTR R: TCACACGCGGCCGCGTCTATTTAAGCCATCTCTGCCA        |
| NDUFS7                   | F: CAGTCAAGCTCGAGCAGGATCTGGTACCGCAGGTAG<br>3'UTR R: TCAACTGCGGCCGCGTCTGAGGGCAGGTTTATTGACAAC      |
| NDUFA4L2                 | F: CAGTGACTCTCGAGCAGCAGACTTCTAAGCCAGGCTGG<br>3'UTR R: TCACTGCGGCCGCGTCTGATTTTGCCACGGCTGC         |
| CYC1                     | F: CAGTGACTCTCGAGCAGCCTGTCCAGTGTCTGCTTGC<br>3'UTR R: TCACTGCGGCCGCGTACCATGATGGGGCTGAAGG          |
| UQCRC1                   | F: CAGTGACTCTCGAGCAGGGGAAGCCTATGTAAGCAAG<br>3'UTR R: TCACTGCGGCCGCGTATCACTTCTCAGCAGAGGATT        |
| APOE                     | F: GAATGACTCTCGAGCAGAATCACTGAACGCCGAAGC<br>3'UTR R: CATGCAAGCGGCCGCGTATGATGCGTGAACTTGGTGAATC     |



**Table S9.** Oligo sequences for cloning short MREs and 3'UTRs. Red text indicates restriction enzyme sites, gray text indicates restriction site flanking regions, and sequences in black are annealing regions.

| <b>Target</b>      | <b>Oligo: Sequence 5' &gt; 3'</b>                                                         |
|--------------------|-------------------------------------------------------------------------------------------|
|                    | <i>Oligo Annealing</i>                                                                    |
| NDUFS8<br>3'UTR -A | Top: TCGAGCAGCGCCCCACCGGCCCGCAGCCCCTG<br>Bottom: TTGGGCAGCAGGGGCTGCGGGCCGGTGGGGCGCTGC     |
| NDUFS8<br>3'UTR -B | Top: CTGCCCAATAAAACCACTCCGACCCACGGAGACGC<br>Bottom: GGCCGCGTCTCCGTGGGGTCGGAGTGGTTTAA      |
| GRINA<br>MRE       | Top: TCGAGCAGCCAGCTCGCTGTGCCCCTCAGGACGC<br>Bottom: GGCCGCGTCCTGAGCGGGCACAGCGAGCTGGCTGC    |
| VEGFB<br>MRE       | Top: TCGAGCAGGCAGCAGTTTCCACATGTGCACGACGC<br>Bottom: GGCCGCGTCGTGCACATGTGGAACTGCTGCCTGC    |
| ATP6V0C<br>MRE     | Top: TCGAGCAGACAGCCTGACACATACGCACGGGGACGC<br>Bottom: GGCCGCGTCCCCGTGCGTATGTGTCAGGCTGTCTGC |
| TMUB1<br>MRE       | Top: TCGAGCAGGCATCTGCTGTGCTGCCTCGGCGACGC<br>Bottom: GGCCGCGTCGCCGAGGCAGCGACAGCAGATGCCTGC  |
| GRINA<br>Mutant    | Top: TCGAGCAGCCAACTCACTATGCCCCTCAGGACGC<br>Bottom: GGCCGCGTCCTGAGCGGGCATAGTGAGTTGGCTGC    |
| VEGFB<br>Mutant    | Top: TCGAGCAGGCAACAGTTTCCAAATGTGAACGACGC<br>Bottom: GGCCGCGTCGTTCACATTTGGAACTGTTGCCTGC    |
| ATP6V0C<br>Mutant  | Top: TCGAGCAGACAACCTGACACATACACAAGGGGACGC<br>Bottom: GGCCGCGTCCCCTTGTGTATGTGTCAGGTTGTCTGC |
| TMUB1<br>Mutant    | Top: TCGAGCAGGCATCTACTATAGCTGCCTCGGCGACGC<br>Bottom: GGCCGCGTCGCCGAGGCAGCTATAGTAGATGCCTGC |
